# Supplementary material for: Cancer Care Coordination: a Systematic Review and Meta-Analysis of Over 30 Years of Empirical Studies
Source: Springer Nature journal article supplement (doi:10.1007/s12160-017-9876-2), 2017-07-06
Supplement: MOESM2 [file 13279072]

## Sheet: Sheet1
Appendix Table A2. Summary of the Cancer Care Coordination Studies (N=52)
	Reference	Year	Tumor type	Intervention	Study design	Findings on process	Findings on outcome
Detection (N=5)
	Keating NL et al. Ann Int Med. 2011;154(11):727-736.	2011	mixed		comparative observational study	Compared with the fee-for-service Medicare population, the VHA population had earlier stage of dx, higher adjusted rates of curative surgery, chemotx, bisphosphonate tx, lower adjusted rates of radiotx (colorectal ca, colorectal ca, diffuse large B-cell non-Hodgkin lymphoma, multiple myeloma, prostate ca, respectively). More comorbid illness. Adjusted rates were similar for 9 other measures.
	Phillips CE et al. J Gen Intern Med2011;26(2):123-129.	2011	breast	Patient navigation	rct		Mammogram adherence was higher in the intervention group compared with the control group, except among Hispanics.
	Phillips Kaet al. Health Serv Res 2004;39(1):153-178.	2004			retrospecive cohort analysis		Higher likelihood of mammography screening, clinical breast examinations, and Pap smears. Gatekeeper requirements not associated with prostate cancer screening. No association between screening utilization and aggregate plan types (HMO, POS, PPO, FFS).
	Reid BC et al.Oral Oncol 2006; 42(5): 510-516.	2006	mixed		retrospective cohort analysis	Continuuity of care and stage of diagnosis had dose-response pattern with internist but not a general or family physician, for oral cavity tumors, not pharyngeal tumors. Laryngeal tumors were borderline statistically significant. Regular continuous care from the same primary care provider associated with early diagnosis of HNCA when the anatomic site was the oral cavity and the provider was an in…
	Wernli KJ et al. Am J Managed Care 2011;17(2):162-167.	2011	breast		retrospective cohort	Later follow-up (≥8 days vs ≤7 days) after an abnormal screening mammogram associated with; being older, Asian, or having a college degree. Characteristics associated with earlier follow-up included family history of breast cancer, symptoms at time of mammogram, or extremely dense breasts. For diagnostic mammograms, symptoms at time of mammogram, and being obese were associated with earlier follo…
Diagnosis (N=9)
	Alsamarai S et al. Clin Lung Cancer 2013;14(5):527-534.	2013	lung	Cancer Care Coordination Program (CCCP): comprehensive approach	retrospective cohort	Implementation of the CCCP resulted in a mean reduction of 25 days between first abnormal image and the initiation of treatment (126 to 101 days; P = .015)
	Hong NJ, wt al. J Interprofess Care. Nov 2009;23(6):599-610.	2009	mixed		cross-sectional survey	Physicians and surgeons both perceived more benefits of MCC's (multidisciplinary cancer conference) for coordinating and improving plans than administrators.
	Hunnibell LS et al. Clin J Oncol Nurs 2012;16(1):29-36.	2012	lung		retrospecive cohort analysis	Timeliness of care of patients with lung cancer significantly improved. Pulmonary consult turnaround improved, as did stage at diagnosis
	Keating Nlet al.Ann Int Med. 2011;154(11):727-736.	2011	mixed		comparative observational study	Compared with the fee-for-service Medicare population, the VHA population had earlier stage of dx, higher adjusted rates of curative surgery, chemotx, bisphosphonate tx, lower adjusted rates of radiotx (colorectal ca, colorectal ca, diffuse large B-cell non-Hodgkin lymphoma, multiple myeloma, prostate ca, respectively). More comorbid illness. Adjusted rates were similar for 9 other measures.
	Rose DE et al. Health Serv Res. 2012;47(3 PART 1):1091-1116.	2012	breast		cross sectional survey		Physician practice style varied by physician specialty, practice setting, financial incentives, and barriers to referrals. Patients with medical oncologists who co-managed tasks had higher patient ratings of care.
	Skolarus TA et al.J Urology. 2010;184(6):2279-2284.	2010	prostate		retrospective cohort analysis	Urologists provided most prostate cancer care. Radiation oncologist involvement decreased from the initial phase to the continuing care and end of life phases, respectively. Conversely medical oncology and to a lesser degree primary care captured a greater percent of ongoing prostate cancer care. Primary care providers were responsible for 47% of overall health care in men with prostate cancer.
	Stone MD et al.Am J Surgery. 2007;194(4):482-487.	2007	breast		cross sectional survey	BHP (combined medical/surgical breast health program )-referred patients had significantly shorter times to surgical appointment than non-BHP referrals. A referring provider survey indicated 96% satisfaction.
	Sussman J et al. J Psychosocial Oncol.2011;29(3):286-307.	2011	mixed	Nurse case manager	prospective comparative trial	Significant improvements in patient-reported outcomes (via Supportive Cancer Needs Survey Short Form 34) in: unmet needs, quality of life, continuity of care, as well as shift in patterns of health resource utilization from acute care settings to the community.	No significant change in global health or physical functioning (EORTC-QLC-30 [v3]), but no deterioration, from acute care settings to the community from baseline to 4 and 8 weeks.
	Yorio JT et al. J Thoracic oncol 2009;4(11):1322-1330.	2009	lung		retrospective cohort analysis	Patients in the private hospital setting (vs. public) were more likely to receive timely treatment.	Treatment interval (shorter vs. longer) was not associated with overall survival in lung cancer.
Treatment (N=24)
	Aubin M et al. Ann Fam Med 2010;8(6):526-532.	2010	lung		cross-sectional survey	A majority of patients identified the oncology team/ oncologists as mainly responsible for their cancer care, except at the advanced phase, with the role to their family physician. Most patients would have liked their family physician to be more involved in all aspects of cancer care.
	Carroll JK et al. J Cancer Educ 2011;26(4):761-766.	2011	mixed	Patient navigation	cross sectional survey	Navigator baseline estimates of navigation intensity predicted total navigation time, independent of patient characteristics. The total number of barriers, rather than any specific type of barrier, predicted increased navigator time, with a 16% increase for each barrier.
	Chumbler NR et al. J Ambulat Care Manag. 2007;30(4):308-317.	2007	mixed	Home telehealth	pre-post questionnaire		Cancer Cancer Care Coordination/Home-Telehealth (CCHT) patients had significantly fewer preventable services, bed days of care for hospitalizations (all cause and chemotx-related) than the control group.
	Chumbler NR et al. J Telemed Telecare. 2007;13(1):20-25.	2007	mixed	Home telehealth	pre-post questionnaire	Daily collection of symptoms with chemotherapy; nervousness/worry symptoms and treatment time were signiﬁcant predictors of HRQL.	Health-related quality of life (FACT-G, version 3) incresed 6.5-points from baseline to end of tx, an important clinical difference, among participants in the Cancer Care Dialogues Model, with daily telehealth interactions between patients at home and their care coordinator.
	Dwight-Johnson M et al. Psychosomatic 2005;46(3):224-232.	2005	mixed	Education about depression and cancer, treatment options and followup.	rct		Patients receiving collaborative care (CC) in public sector were more likely to show >=50% improvement in depressive symptoms, as measured by the Personal Health Questionnaire (PHQ or PRIME-MD) vs. usual care. CC patients more likely to show improvement in emotional well-being (FACT) vs. ususal care.
	Elliott TE et al. J Rural Health. 2004;20(1):26-35.	2004	mixed	Educational activities directed system-wide	rct	Travel for health care was significantly reduced in the community group exposed to the intervention during months 13 to 24 following cancer diagnosis.	No significant differences in satisfaction with care, economic barriers to care, or health-related quality of life (Functional Living Index-Cancer [FLIC]).
	Fiscella K et al. Cancer Epidemiol Biomark Prev 2012;21(10):1673-1681.	2012	mixed	Patient navigation	rct		Primary analysis showed no statistically significant group differences in time to completion of primary cancer treatment, satisfaction with cancer-related care, or psychologic distress. Subgroup analysis showed that socially disadvantaged patients (i.e., uninsured, low English proficiency, and non-English primary language) who received Patient Navigation reported significantly higher satisfaction…
	Gold HT et al. Am J Managed Care. 2009;15(11):785-789.	2009	breast		retrospecive cohort analysis	Of women receiving breast-conserving surgery and radiotx in this cohort, 14% experienced delayed radiotx, even though they had insurance and access to care in integrated delivery systems. Women receiving delayed care were more likely to be non-White and Hispanic.
	Goodwin JS et al. JAGS 2003;51(9):1252-1259.	2003	breast	Nurse case manager	rct	Of women undergoing breast-conserving surgery, greater percentages in the case management group (vs. control) received adjuvant radiotx and axillary dissection. Women in the case management group were also more likely to receive more breast reconstruction surgery, and women in the case management group with advanced cancer were more likely to receive chemotx. Higher percentages of women in the ca…
	Greer JA et al. J Clin Oncol;2012;394-400.	2012	lung	Palliative care program	secondary analysis of RCT	Overall number of chemotherapy regimens did not differ significantly by early palliative care integrated with standard oncology care vs. standard oncology care. Study group participants receiving early palliative care had half the odds of receiving chemotherapy within 60 days of death, longer interval between the last dose of intravenous chemotherapy and death.	Higher enrollment in hospice care for longer than 1 week in early palliative care integrated with standard oncology care vs. standard oncology care.
	Guadagnolo BA et al. Cancer. 2011;117(12):2754-2761.	2011	mixed	Patient navigation	prospective comparative trial	Patients treated with radiation therapy with curative intent who underwent patient navigation had fewer days of treatment interruption vs. historical controls. Of the 332 patients, 72 (22%; 95% CI, 17%-26%) were enrolled on a clinical treatment trial or cancer control protocol.
	Hawley ST et al. Patient Educ Counsel 2010;81(SUPPL. 1):S34-S40.	2010	breast		cross sectional survey	Outcomes were two dichotomous measures reflecting patient appraisal of care coordination during their treatment experience; 16.4% of women perceived low care coordination and 12.5% reported low satisfaction. Race/ethnicity was not significantly associated with care coordination. Women with low subjective health literacy were 3–4 times as likely as those with high health literacy to perceive low c…
	Hendren S, Griggs JJ et al.Cancer Epidemiol Biomark Prev 2012;21(10):1682-1690.	2012	mixed	Patient navigation	rct		Total and subscale FACT scores did not differ between patient navigation and control groups. The emotional well-being subscale change from baseline in patient navigation (vs. control) approached significance.
	Hong NJ et al.J Interprofess Care. Nov 2009;23(6):599-610.	2009	mixed		cross sectional survey	Physicians and surgeons both perceived more benefits of MCC's (multidisciplinary cancer conference) for coordinating and improving plans than administrators.
	Howell DM et al.Support Care Cancer 2008;16(12):1343-1352.	2008	mixed		mixed methods	Two-thirds (68%) of multidisciplinary service providers identified the nurse-led supportive care clinical case management program (ICCN) as either extremely or very important in the provision of supportive care. Service providers most commonly referred patients to ICCN for psychosocial support or to have their information needs addressed.
	Katz SJ et al.Med Care. 2010;48(1):45-51.	2010	breast		cross-sectional survey	Surgeon practice specialization varied markedly with about half of the surgeons devoting 15% or less of their total practice to breast cancer, whereas 16.2% of surgeons devoted 50% or more. There was also large variation in the extent of the use of patient and practice management processes with most surgeons reporting low use. Patient and practice management process measures were positively assoc…
	Keating NL et al. Ann Int Med. 2011;154(11):727-736.	2011	mixed		comparative observational study	Earlier stage of dx, higher adjusted rates of curative surgery, chemotx, bisphosphonate tx, lower adjusted rates of radiotx (in colorectal ca, colorectal ca, diffuse large B-cell non-Hodgkin lymphoma, multiple myeloma, prostate ca, respectively). More comorbid illness. Adjusted rates were similar for 9 other measures.
	Klabunde CN et al. J Gen Int Med 2009;24(9):1029-1036.	2009	mixed		cross-sectional survey	Over 90% of PCPs fulfilled general medical care roles for patients with cancer such as managing comorbid conditions, chronic pain, or depression; establishing do-not-resuscitate status; and referring patients to hospice. Oncologists were less involved in these roles. Determining the treatment preferences of individual patients and deciding on the use of surgery were the only cancer care roles in …
	McCorkle R et al.Nurs Res. 2011;60(1):47-57.	2011	mixed	Nurse case manager	rct		Significant difference in the number of primary care visits; women in the attention control group went to their primary care providers more often than the intervention group. The women who reported more visits also reported more depressive symptoms. There were no differences in hospitalizations and oncology outpatient visits between the two groups. A trend was found in the number of emergency roo…
	Mkanta WN et al. Cancer Nurs 2007;30(6):434-440.	2007	mixed	Home telehealth	cross sectional survey		Older patients in the dialogues intervention model reported 10.35 points higher in HRQOL (P = .007) vs. younger patients.
	Rose DE et al. Health Serv Res. 2012;47(3 PART 1):1091-1116.	2012	breast		cross sectional survey		Patients with medical oncologists who co-managed 10 clinical tasks (vs. other practice styles, e.g., managing task without input from other clinicians) had higher patient ratings of care (via interview adapted from CAHPS hospital survey).
	Skolarus TA et al. J Urology. 2010;184(6):2279-2284.	2010	prostate		retrospective cohort analysis	Urologists provided most prostate cancer care. Radiation oncologist involvement decreased from the initial phase to the continuing care and end of life phases. Conversely medical oncology and to a lesser degree primary care captured a greater percent of ongoing prostate cancer care. Primary care providers were responsible for 47% of overall health care in men with prostate cancer.
	Sussman J et al. J Psychosocial Oncol.2011;29(3):286-307.	2011	mixed	Nurse case manager	prospective comparative trial	Significant improvements in patient-reported outcomes in: unmet needs, quality of life, continuity of care, as well as shift in patterns of health resource utilization from acute care settings to the community.	No significant change in global health or physical functioning (EORTC-QLC-30 [v3]), but no deterioration.
	Yosha AM et al. Pat Educ Counsel 2011;82(3):396-401.	2011	breast		secondary analysis of RCT	Patients and navigators (paired) had general consensus about important patient needs for cancer care, but characterized these needs differently.
Survivorship (N=17)
	Campbell Mket al. J Cancer Surviv.2011;5(3):271-282.	2011	mixed		cross sectional survey	Among high quality survivorship programs in cancer centers of excellence (COE, LIVESTRONG), scores on the survey showed overall “reasonable support” for survivorship care; however, the clinical information system domain was least developed. Few COEs provided patients with self-management tools and interventions.
	Cardella J et al. J Eval Clin Prac 2008;14(3):407-415.	2008	colorectal		cross sectional survey	Guideline targets were met for 70% of clinic visits; 49% of carcinoembryonic antigen (CEA) determinations; and 62% of abdominal imaging studies. Post-operative colonoscopy did not occur in 6% patients. Access to testing and confusion about which provider orders investigations were identified as important barriers to followup.
	Casillas J et al. J Cancer Surviv 2011;5(4):371-381.	2011	mixed		cross sectional survey	Seventy-one percent of young adult survivor participants reported currently attending an oncology survivorship clinic. Regarding survivorship care planning, 33% did not have copies of their cancer-related medical records, 48% did not have a treatment summary, and 55% had not received a survivorship care plan. Seventy percent identified the oncologist as the most important health care provider for…
	Grunfeld E et al. J Clin Oncol.2011;29(36):4755-4762.	2011	breast	Survivorship care plan	rct		The primary outcome was cancer-related distress at 12 months, assessed by the Impact of Event Scale (IES). Secondary outcomes included quality of life (SF-36) patient satisfaction, continuity/coordination of care, and health service measures. There were no differences between groups on cancer-related distress or on any of the patient-reported secondary outcomes. More patients in the intervention …
	Haggstrom DA et al. J Gen Int Med 2009;24(SUPPL. 2):S472-S479.	2009	colorectal		cross sectional survey		A minority (16%) of CRC survivors reported that the doctor they most often saw for followup cancer care was a PCP, while 60% saw an oncologist. Many CRC survivors (40%) saw >1 physician for followup cancer care. Survivors most often seen by PCPs were more likely to have three or more medical comorbidities than survivors seen by subspecialty physicians. Survivors seen by PCPs were less likely to r…
	Hollowell K et al. Cancer. 2010;116(9):2090-2098.	2010	breast		retrospective cohort analysis		The majority of patients (90%) were followed by specialists with 10% followed by PCPs. Patients with advanced disease and a greater risk of disease recurrence more often received specialist care. Patients followed by specialists were more often seen at ASCO-recommended intervals; however, many patients were followed inconsistently. Breast disease was often not the focus of PCP visits or mentioned…
	Howell DM et al. Support Care Cancer 2008;16(12):1343-1352.	2008	mixed		mixed methods	Two-thirds (68%) of multidisciplinary service providers identified the nurse-led supportive care clinical case management program (ICCN) as either extremely or very important in the provision of supportive care. Service providers most commonly referred patients to ICCN for psychosocial support or to have their information needs addressed.
	Jones LE et al. Euro J Cancer Care. 2009;18(2):165-173.	2009	lung		retrospective cohort analysis		Rates of primary care utilization decreased significantly by 0.02 visits per person-month (VPPM) in the 12-month period after cancer diagnosis. Utilization for acute conditions significantly decreased by 20% in the 12-month period after diagnosis, from 0.32 VPPM before diagnosis to 0.12 VPPM after diagnosis. Utilization for chronic conditions remained stable after diagnosis.
	Keating NL et al. Ann Int Med. 2011;154(11):727-736.	2011	mixed		comparative observational study	Earlier stage of dx, higher adjusted rates of curative surgery, chemotx, bisphosphonate tx, lower adjusted rates of radiotx (colon ca, diffuse large B-cell non-Hodgkin lymphoma, multiple myeloma, prostate ca, respectively). More comorbid illness. Adjusted rates were similar for 9 other measures.
	Ko C et al. J Surg Res 2002;105(1):53-57.	2002	mixed		cross-sectional survey		Three hundred one cancer patients (29 lung, 88 prostate, 119 breast, 65 colon) and 6745 control patients were analyzed. Among the cancer patients, 81% had a coexistent disease, with 59% reporting cardiovascular comorbidity and 17% reporting pulmonary comorbidity; the range of comorbidities was substantial. Of note, 27–39% of cancer patients continued to smoke tobacco (vs controls); the rates of p…
	Pollack LA et al. Cancer. 2009;115(22):5284-5295.	2009	mixed		retrospective cohort analysis	From SEER-Medicare claims submitted 6 to 12 years after initial diagnosis, 46% of female breast cancer survivors, 26% of colorectal cancer survivors, and 14% of prostate cancer survivors saw hematologists/oncologists. Radiation oncologists were seen by 11%, 2%, and 14% of breast, colorectal,and prostate cancer survivors, respectively. The percentage of survivors who visited cancer and cancer-rela…
	Skolarus TA et al. Cancer 2012;118:2837-45	2012	prostate		retrospective cohort analysis		Using SEER-Medicare, patients with highly fragmented cancer care tended to be significantly younger, white, and of higher socioeconomic status. Prostate cancer survivorship interventions were most common among patients with the highest fragmentation of care across providers. Higher degrees of fragmentation continued to be significantly associated with repetitive PSA testing (vs. low fragmentation…
	Skolarus TA et al. J Urology. 2010;184(6):2279-2284.	2010	prostate		retrospective cohort analysis	Urologists provided most prostate cancer care. Radiation oncologist involvement decreased from the initial phase to the continuing care and end of life phases. Conversely medical oncology and to a lesser degree primary care captured a greater percent of ongoing prostate cancer care. Primary care providers were responsible for 47% of overall health care in men with prostate cancer.
	Snyder CF et al. J Gen Intern Med 2008;23(3):254-259.	2008	colorectal		retrospective cohort analysis		There was a trend over time of increased visits to all physician types, which was statistically significant for oncology specialists and other physicians (p<.001) but not PCPs. The percentage of survivors receiving preventive services remained relatively stable across the 5 cohorts, except for an increase in bone densitometry (p<.05). Survivors who visited both a PCP and oncology specialist were …
	Snyder CF et al. J Gen Int Med 2009;24(4):469-474.	2009	breast		retrospective cohort analysis		Survivors were significantly less likely to receive influenza vaccination, cholesterol screening, colorectal cancer screening, and bone densitometry but more likely to receive mammograms than controls. Over time, colorectal cancer screening and mammography decreased and influenza vaccination increased for both groups. Trends over time in care receipt were similar for survivors and controls. Over …
	Steel JL et al. J Clin Oncol 32:5s, 2014 (suppl; abstr 9522)	2014	mixed	Psychiatric collaborative care	rct		The intervention, stepped psychiatric collaborative care, was compared to an enhanced usual care arm for patients with advanced cancer. Patients with clinical levels of symptoms, who were randomized to the intervention arm, reported reductions in depression (via Center for Epidemiological Studies-Depression scale), pain (via Brief Pain Inventory), fatigue (via Functional Assessment of Cancer Ther…
	Stricker CT et al. J Cancer Surviv 2011;5(4):358-370.	2011	breast		cross sectional survey	On average, fewer than half of IOM content recommendations were met for Treatment Summaries (TS;M=46%) and less than two thirds for Survivorship Care Plans (SCP;M=59%) for breast cancer survivors within the LIVESTRONG™ Network of Survivorship Centers of Excellence. No sites achieved ≥75% overall concordance with IOM recommendations for TSs and only two of 13 met this criterion for SCPs. Nonethele…
End of Life (N=7)
	Cantwell P et al. J Palliative Care 2000;16(1):23-28.	2000	mixed	Palliative care program	pre-post questionnaire		Predictors of home death (self report) were caregiver and patient support for home death, support of family MD, presence of more than one caregiver
	Daly BJ et al. J Pain Symptom Manage 2013;46(6):775-84	2013	mixed	Palliative care program	rct		There were no statistically significant differences in quality of end-of-life care between the group receiving interdisciplinary CST in routine care of adults with Stage III or IV lung, gastrointestinal, or gynecologic cancer vs. usual care. Surviving subjects with higher survival expectancy (who also reported better baseline quality of life) in the intervention arm had the greatest (significant)…
	Dudgeon DJ et al. J Pain Symptom Manag 2008;35(6):573-582.	2008	mixed	Palliative care program	pre-post questionnaire	There was some evidence of a decrease in the variability of palliative care practice over time, with a slight increase in the timely documentation of symptoms over the 3 years of the study, particularly pain (via The Edmonton Symptom Assessment Scale) and the Palliative Performance Scale. A previous process evaluation via focus groups and surveys with frontline healthcare professionals reported t…	The implementation of common assessment tools, collaborative care plans, and symptom management guidelines for two cohorts of cancer patients and caregivers was assessed via chart audits pre- and post-implementation. Audits showed a significant increase in documentation of pain in charts from 24.5% to 74.6%. Administrative data showed a signficant decrease in the percentage of patients with at le…
	Hui D et al. JAMA 2010;303(11):1054-1061.	2010	mixed	Palliative care program	cross sectional survey	National Cancer Institute (NCI) designated cancer centers were significantly more likely to have a palliative care program (defined as at least one palliative care physician; 98%] vs non-NCI cancer centers; 78%), with at least 1 palliative care physician (92% vs 74%), an inpatient palliative care consultation team (92% vs 56%), and an outpatient palliative care clinic (59% vs 22%). Few centers ha…
	Sharma G et al.Arch Int Med 2009;169(1):81-86.	2009	lung		retrospective cohort analysis		Outpatient to inpatient continuity, captured from SEER-Medicare claims, decreased significantly from 60.1% in 1992 to 51.5% in 2002. Continuity was defined as defined as an inpatient visit by the patient's usual care provider during the last hospitalization. ICU use increased by 5.8% per year from 1993–2002. After adjusting for patient characteristics, patients with outpatient to inpatient contin…
	Skolarus TA et al. J Urology. 2010;184(6):2279-2284.	2010	prostate		retrospective cohort analysis	Urologists provided most prostate cancer care. Radiation oncologist involvement decreased from the initial phase to the continuing care and end of life phases, respectively. Conversely medical oncology and to a lesser degree primary care captured a greater percent of ongoing prostate cancer care. Primary care providers were responsible for 47% of overall health care in men with prostate cancer.
	Sussman J et al. Palliative Med 2012;26(4):322-335.	2012	mixed		comparative multiple case study	Using key informants and a comparative case study approach, six key features were identified in regions with better population-level performance (i.e. higher home death rate and less ED use). These were: palliative care specific planning and coordination; specified resources, including an advanced practice nursing presence; 24/7 palliative care team access; use of a patient common chart to facili…
tx=treatment; dx=diagnosis; rct=randomized clinical trial, ca=cancer, VHA=Veterans Health Administration; HNCA=head and neck cancer; ED=Emergency Department; ICU=Intensive Care Unit; HRQOL=Health-Related Quality of Life;
PCP=Primary Care Provider; IOM=Institute of Medicine (now called the National Academy of Medicine).
* Dudgeon DJ, Knott C, Chapman C, Coulson K, Jeffery E, Preston S, Eichholz M, Van Dijk JP, Smith A.
Development, Implementation, and Process Evaluation of a and Process Evaluation of a Regional Palliative Care Quality Improvement Project.
J Pain Symptom Manage 2009; 38 (4): 483-495.
