# Supplementary material for: Cancer Care Coordination: a Systematic Review and Meta-Analysis of Over 30 Years of Empirical Studies
Source: Springer Nature journal article supplement (doi:10.1007/s12160-017-9876-2), 2017-07-06
Supplement: MOESM5 [file 13279072]

## Sheet: Pedro Ratings
Appendix Table A5. PEDro Scale *
Article Name	Sum	Eligibility criteria were specified	Subjects were randomly allocated to groups (in a crossover study, subjects were randomly allocated an order in which treatments were received)	Allocation was concealed	The groups were similar at baseline regarding the most important prognostic indicators	There was blinding of all subjects (usually no applicable for behavioral trials)	There was blinding of all who administered the therapy (usually no for behavioral trials)	There was blinding of all assessors who measured at least one key outcome	Measures of at least one key outcome were obtained from more than 85% of the subjects initially allocated to groups	All subjects for whom outcome measures were available received the treatment or control condition as allocated or, where this was not the case, data for at least one key outcome was analysed by “intention to treat”	The results of between-group statistical comparisons are reported for at least one key outcome	The study provides both point measures and measures of variability for at least one key outcome	The study had an adequate treatment fidelity protocol, including manualized treatment.	The study had an adequate treatment fidelity protocol, including monitoring of treatment implementation	Loss to follow-up information is provided
Chumbler, N. R., R. et al. J Ambul Care Manage 2007; 30(4): 308-317.	6	1	0	0	1	0	0	0	1	1	1	1	0	0	0
Daly BJ, et al. J Pain Symptom Manage 2013; 46: 775-84.	6	1	0	0	0	0	0	0	1	1	1	1	0	0	1
Dwight-Johnson, MK.et al. Psychosomatics 2005; 224-232	10	1	1	0	1	0	0	0	1	1	1	1	1	1	1
Fiscella K et al. Cancer Epidemiol Biomark Prev 2012; 21: 1673-1681.	9	1	1	0	1	0	0	0	1	1	1	1	1	0	1
Goodwin, J S et al. JAGS 2003; 51(9): 1252-1259.	9	1	1	0	1	0	0	1	1	1	1	1	0	0	1
Greer, JA et al. J Clin Oncol 2012; 30:394-400	9	1	1	0	1	0	0	0	1	1	1	1	1	0	1
Grunfeld EG et al. J Clin Oncol 2011; 29:4755-4762.	8	1	1	0	1	0	0	1	1	1	1	1	0	0	0
Hendren S et al.Cancer Epidemiol Biomark Prev 2012; 21: 1682-1690.	7	1	1	0	1	0	0	0	1	0	1	1	1	0	0
McCorkle RS.et al. Nurs Res 2011; 47-57	8	1	1	0	0	0	1	1	0	1	1	1	0	0	1
Phillips CE et al. (2010). J Gen Intern 2010; Med 26(2):123–9	8	1	1	0	1	0	0	0	1	1	1	0	1	1	0
Steel J et al. J Clin Oncol 32:5s, 2014 (suppl; abstr 9522).	11	1	1	0	1	0	0	1	1	1	1	1	1	1	1
* 1=yes, 0=no
